# Supplementary material for: A numerical study of contributions to air pollution in Beijing during CAREBeijing-2006
Source: Copernicus journal article supplement (doi:10.5194/acp-11-5997-2011), 2011-06-24
Supplement: Supplementary file 1 [file acp-11-5997-2011-supplement.zip]

Archive with 4 entries (3 files):
- 945sup/
- 945sup/Supplement for BD-PM10.ppt
- 945sup/Supplement for TJ-ozone.ppt
- 945sup/supplement meteo.pdf
